# Supplementary material
Source: HighWire-hosted journal article supplement (http://www.jrheum.org/highwire/filestream/29672/field_highwire_adjunct_files/0/140435DataSuppl.pdf)
Supplement: 140435DataSuppl.pdf [file 140435DataSuppl.pdf]

*Supplement Table 1.* Demographic characteristic of studied populations.

| Sample           | Characteristics | Control            |                    | RA                   |
|------------------|-----------------|--------------------|--------------------|----------------------|
|                  |                 | 10 OA              | 10 AS              | 10                   |
| Synovium         | No. subjects    | 10 OA              | 10 AS              | 10                   |
|                  | Female/male     | 6/4                | 3/7                | 7/3                  |
|                  | Age             | 41 to 77 (mean 60) | 28 to 54 (mean 35) | 23 to 70 (mean 50)   |
|                  | CRP             | -                  | -                  | 30–100 mg/l          |
|                  | anti-CCP        | -                  | -                  | 300–3000 u/ml        |
| Peripheral blood | RF              | -                  | -                  | 160–2560 u/ml        |
|                  |                 |                    |                    |                      |
|                  | Cohort I        | n/female           | 160/58             | 267/183              |
|                  |                 | Age                | 23 to 70 (mean 48) | 22 to 71 (mean 51.7) |
|                  | Cohort II       | n/female           | 1056/792           | 1151/863             |
|                  | Age             | 20 to 75 (mean 56) | 21 to 75 (mean 57) |                      |

RA: rheumatoid arthritis; OA: osteoarthritis; AS: ankylosing spondylitis.

Supplementary Table 2. Downregulated genes in siRNA-PCSK6 RASF.

| Accession No.   | Gene Symbol         | Gene Description                                                           | Fold Change (si 1/Mock) | GO Molecular Function Term                                           | p       |
|-----------------|---------------------|----------------------------------------------------------------------------|-------------------------|----------------------------------------------------------------------|---------|
| NM_001128635    | <i>RIMBP3B</i>      | RIMS binding protein 3B                                                    | 0.352258396             | Oxidoreductase activity                                              | 0.00109 |
| NM_001828       | <i>CLC</i>          | Charcot-Leyden crystal protein                                             | 0.360919                | Lysophospholipase activity // sugar binding // hydrolase activity // | 0.001   |
| NM_001190706    | <i>MTRNR2L9</i>     | MT-RNR2-like 9                                                             | 0.387046283             | ---                                                                  | 0.00156 |
| NM_001123375    | <i>HIST2H3D</i>     | Histone cluster 2, H3d                                                     | 0.392534945             | DNA binding // protein binding                                       | 0.00745 |
| BC030554        | <i>TARP</i>         | TCR gamma alternate reading frame protein                                  | 0.39323428              | ---                                                                  | 0.00857 |
| XR_113625       | <i>LOC100505937</i> | Hypothetical LOC100505937                                                  | 0.411953099             | ---                                                                  | 0.01088 |
| BC039116        | <i>TRGC2</i>        | T cell receptor gamma constant 2                                           | 0.412056764             | Transmembrane receptor activity                                      | 0.0274  |
| NM_152997       | <i>C4orf7</i>       | Chromosome 4 open reading frame 7                                          | 0.412929101             | ---                                                                  | 0.04    |
| NM_001168221    | <i>ALS2CR11</i>     | Amyotrophic lateral sclerosis 2 (juvenile) chromosome region, candidate 11 | 0.424658785             | ---                                                                  | 0.034   |
| NM_006273       | <i>CCL7</i>         | Chemokine (C-C motif) ligand 7                                             | 0.429194948             | Chemokine activity // heparin binding // chemokine activity          | 0.01    |
| NM_025189       | <i>ZNF430</i>       | Zinc finger protein 430                                                    | 0.430173632             | DNA binding // zinc ion binding // metal ion binding //              | 0.0039  |
| ENST00000390331 | <i>IGLC7</i>        | Immunoglobulin lambda constant 7                                           | 0.430693961             | Antigen binding // antigen binding                                   | 0.0325  |
| NM_080748       | <i>ROMO1</i>        | Reactive oxygen species modulator 1                                        | 0.440564147             | Molecular function                                                   | 0.0322  |
| NM_024733       | <i>ZNF665</i>       | Zinc finger protein 665                                                    | 0.457570199             | DNA binding // zinc ion binding // metal ion binding                 | 0.00515 |
| BC104224        | <i>DCAF4L1</i>      | DDB1 and CUL4 associated factor 4-like 1                                   | 0.466438571             | ---                                                                  | 0.002   |
| AF210649        | <i>NAG20</i>        | NAG20                                                                      | 0.481154458             | ---                                                                  | 0.003   |

|                 |                  |                                                     |             |                                                                                   |        |
|-----------------|------------------|-----------------------------------------------------|-------------|-----------------------------------------------------------------------------------|--------|
| ENST00000423958 | <i>AKR1B15</i>   | Aldo-keto reductase family 1, member B15            | 0.481154458 | Oxidoreductase activity                                                           | 00.022 |
| NM_033273       | <i>ZNF479</i>    | Zinc finger protein 479                             | 0.482096546 | DNA binding // zinc ion binding // metal ion binding                              | 0.045  |
| NM_003540       | <i>HIST1H4F</i>  | Histone cluster 1, H4f                              | 0.482563934 | Protein binding // DNA binding // transcription initiation factor activity        | 0.001  |
| NM_130467       | <i>PAGE5</i>     | P antigen family, member 5 (prostate associated)    | 0.486418498 | ---                                                                               | 0.0001 |
| NM_001004739    | <i>OR5L2</i>     | Olfactory receptor, family 5, subfamily L, member 2 | 0.494285675 | Receptor activity // olfactory                                                    | 0.004  |
| NM_001039724.3  | <i>NOSTIN</i>    | Nitric oxide synthase trafficker                    | 0.5         | Endocytosis                                                                       | 0.035  |
| NM_020130       | <i>C10orf116</i> | Chromosome 8 open reading frame 4                   | 0.5         | Apoptosis                                                                         | 0.0149 |
| NM_004994.2     | <i>MMP-9</i>     | Matrix metalloproteinase 9                          | 0.5         | Local proteolysis of the extracellular matrix                                     | 0.032  |
| NM_201280       | <i>TXNDC5</i>    | Thioredoxin domain containing 5                     | 0.5         | Vesicle-mediated transport // otolith morphogenesis // developmental pigmentation | 0.0385 |
| NM_001530       | <i>HIF1alpha</i> | Hypoxia inducible factor 1                          | 0.5         | Response to hypoxia                                                               | 0.021  |
| NM_018402       | <i>IL-26</i>     | Interleukin 26                                      | 0.5         | Cell-cell signaling                                                               | 0.0313 |
| NM_002416.1     | <i>CXCL9</i>     | Chemokine (C-X-C motif) ligand 9                    | 0.565356583 | ---                                                                               | 0.0475 |

siRNA: small interfering RNA; PCSK6: proprotein convertase subtilisin/kexin type 6; RASF: rheumatoid arthritis synovium fibroblasts.

Supplementary Table 3. Upregulated genes in siRNA-PCSK6 RASF.

| Accession number | Gene Symbol         | Gene Description                                    | Fold Change (si 1/Mock) | GO Molecular Function Term                                                                                                        | p       |
|------------------|---------------------|-----------------------------------------------------|-------------------------|-----------------------------------------------------------------------------------------------------------------------------------|---------|
| NM_001001915     | <i>OR2G2</i>        | olfactory receptor, family 2, subfamily G, member 2 | 2.008291933             | Receptor activity // olfactory receptor activity /                                                                                | 0.005   |
| AK128852         | <i>NFE2L2</i>       | nuclear factor (erythroid-derived 2)-like 2         | 2.042291784             | ---                                                                                                                               | 0.019   |
| NM_006900        | <i>IFNA13</i>       | interferon, alpha 13                                | 2.065373928             | Cytokine activity // interferon-alpha/beta receptor binding //                                                                    | 0.00476 |
| BC031588         | <i>LOC100508869</i> | hypothetical LOC100508869                           | 2.075190816             | ---                                                                                                                               | 0.0147  |
| AK125454         | <i>LOC100128300</i> | hypothetical LOC100128300                           | 2.081702637             | ---                                                                                                                               | 0.036   |
| ENST00000482608  | <i>C8orf46</i>      | chromosome 8 open reading frame 46                  | 2.082297207             | ---                                                                                                                               | 0.00825 |
| AK125343         | <i>SRXN1</i>        | sulfiredoxin 1                                      | 2.086056163             | Nucleotide binding // DNA binding // ATP binding // antioxidant activity // oxidoreductase activity,                              | 0.0192  |
| NM_001004450     | <i>OR1B1</i>        | olfactory receptor, family 1, subfamily B, member 1 | 2.090469508             | Receptor activity // olfactory receptor activity                                                                                  | 0.014   |
| AK097518         | <i>C1orf49</i>      | chromosome 1 open reading frame 49                  | 2.097727092             | ---                                                                                                                               | 0.011   |
| NM_199336        | <i>FAHD2B</i>       | fumarylacetoacetate hydrolase domain containing 2B  | 2.118050518             | Hydrolase activity // metal ion binding /                                                                                         | 0.0026  |
| NM_178523        | <i>ZNF616</i>       | zinc finger protein 616                             | 2.121438712             | DNA binding // zinc ion binding // metal ion binding /                                                                            | 0.031   |
| DQ341454         | <i>TRBJ2-6</i>      | T cell receptor beta joining 2-6                    | 2.143905031             | ---                                                                                                                               | 0.0017  |
| ENST00000400206  | <i>CSNK1E</i>       | casein kinase 1, epsilon                            | 2.150467011             | Nucleotide binding // protein kinase activity // protein serine/threonine kinase activity // // nucleotide binding // ATP binding | 0.005   |
| NM_152418        | <i>DCAF4L2</i>      | DDB1 and CUL4 associated factor 4-like 2            | 2.156560216             | ---                                                                                                                               | 0.025   |

|                 |                     |                                                     |             |                                                                               |        |
|-----------------|---------------------|-----------------------------------------------------|-------------|-------------------------------------------------------------------------------|--------|
| NM_001105569    | <i>MSGN1</i>        | mesogenin 1                                         | 2.160240595 | DNA binding // transcription regulator activity                               | 0.014  |
| NM_018974       | <i>UNC93A</i>       | unc-93 homolog A (C. elegans)                       | 2.193799989 | Molecular function                                                            | 0.0312 |
| NM_001004744    | <i>OR5R1</i>        | olfactory receptor, family 5, subfamily R, member 1 | 2.194507195 | Receptor activity // olfactory receptor activity /                            | 0.0115 |
| AK123595        | <i>LOC100216546</i> | hypothetical LOC100216546                           | 2.198666822 | ---                                                                           | 0.0073 |
| BC040288        | <i>LOC100130428</i> | IGYY565                                             | 2.206648746 | ---                                                                           | 0.0226 |
| ENST00000390578 | <i>IGHD2-15</i>     | immunoglobulin heavy diversity 2-15                 | 2.505643215 | ---                                                                           | 0.015  |
| NM_001039361    | <i>PRAMEF10</i>     | PRAME family member 10                              | 2.519362989 | ---                                                                           | 0.02   |
| XM_001713850    | <i>LOC730268</i>    | anaphase-promoting complex subunit 1-like           | 2.524497065 | ---                                                                           | 0.01   |
| NM_002722       | <i>PPY</i>          | pancreatic polypeptide                              | 2.541700428 | G-protein-coupled receptor binding // receptor binding // hormone activity // | 0.014  |
| NM_176887       | <i>TAS2R46</i>      | taste receptor, type 2, member 46                   | 2.717855962 | Receptor activity // G-protein coupled                                        | 0.03   |
| ENST00000449138 | <i>LOC100510554</i> | hypothetical protein LOC100510554                   | 3.173381564 | ---                                                                           | 0.015  |

siRNA: small interfering RNA; PCSK6: proprotein convertase subtilisin/kexin type 6; RASF: rheumatoid arthritis synovium fibroblasts.
